# Supplementary material for: Hypoxia increases persulfide and polysulfide formation by AMP kinase dependent cystathionine gamma lyase phosphorylation
Source: PubMed Central journal article supplement — Redox Biol. 2023 Oct 30;68:102949. doi: 10.1016/j.redox.2023.102949 (PMC10641705; doi:10.1016/j.redox.2023.102949), 2023-10-30
Supplement: mmc1.pdf [file mmc1.pdf]

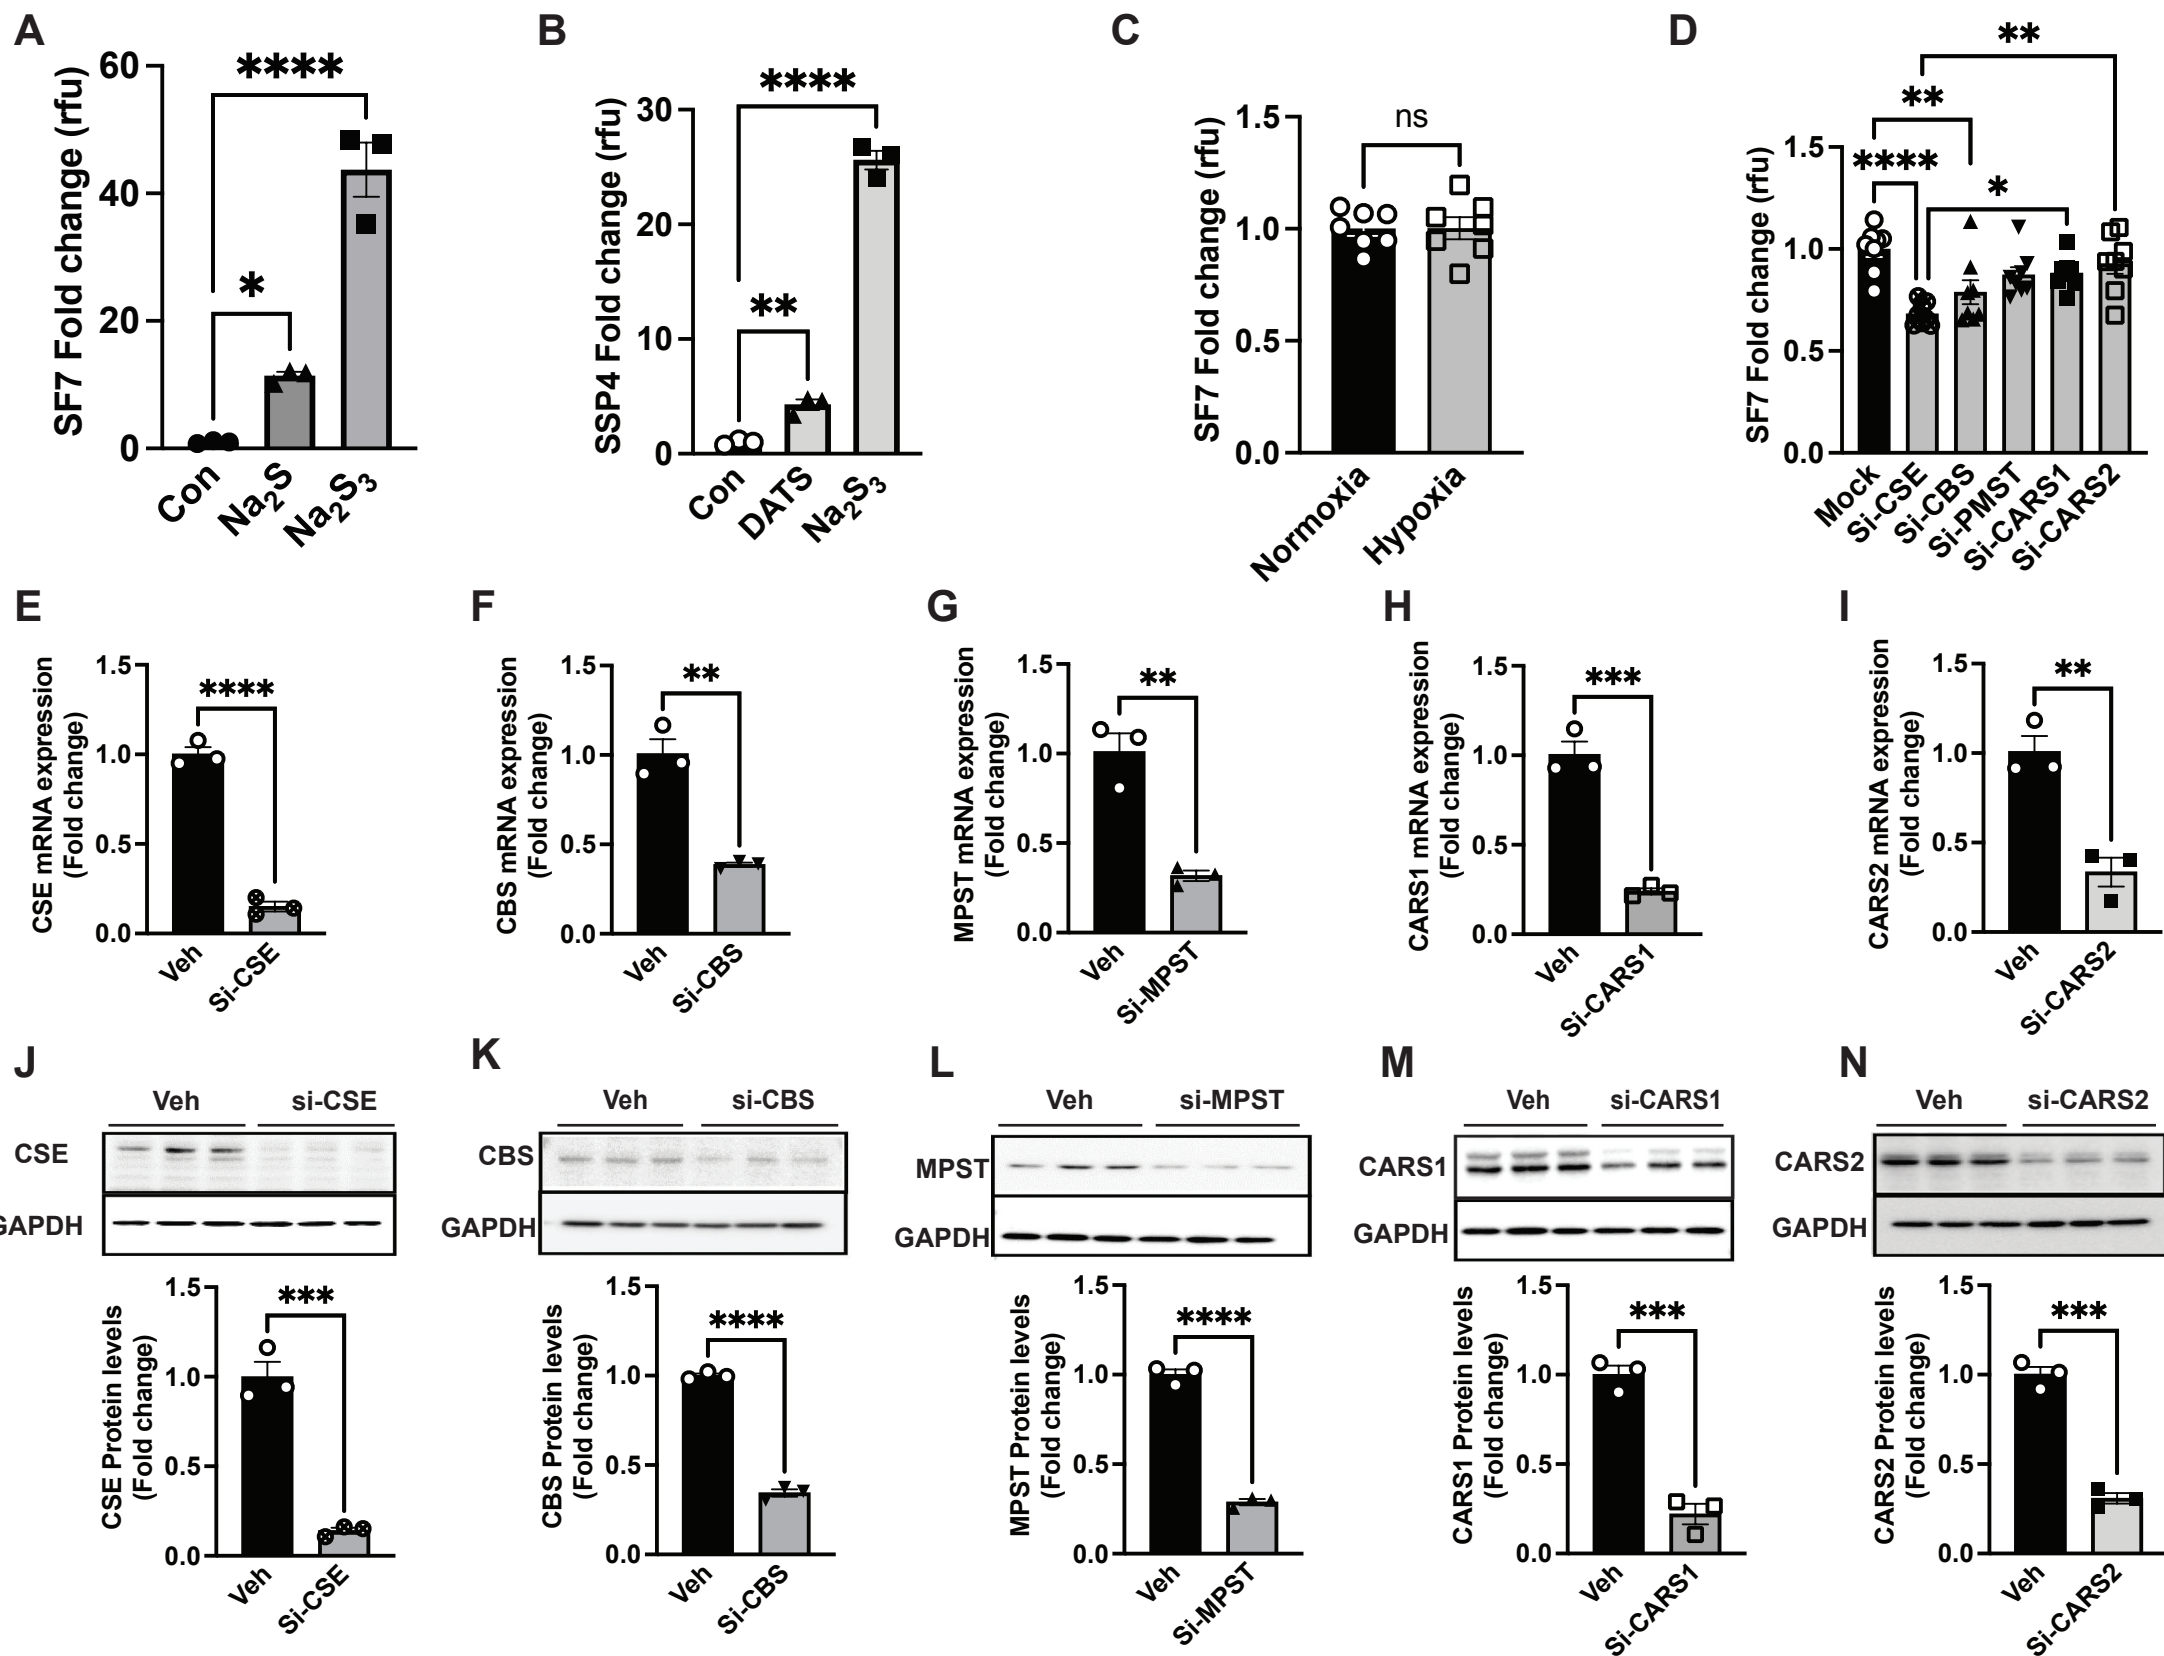

Suppl Figure 1

## A Expression of CSE phospho-negative mutants

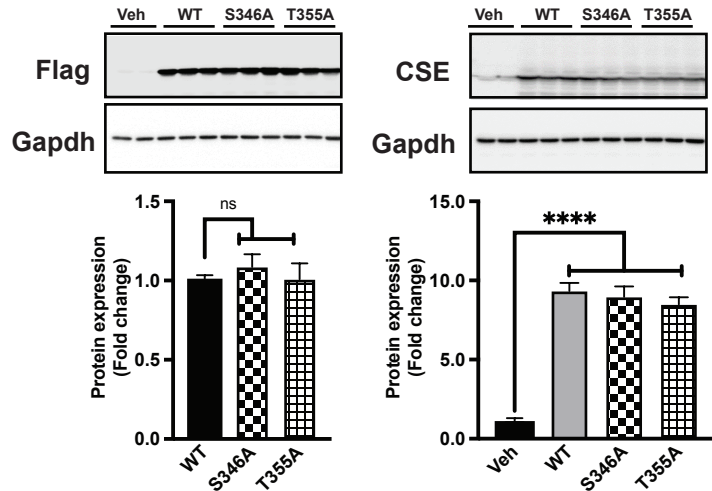

## B Expression of CSE phospho-mimetics

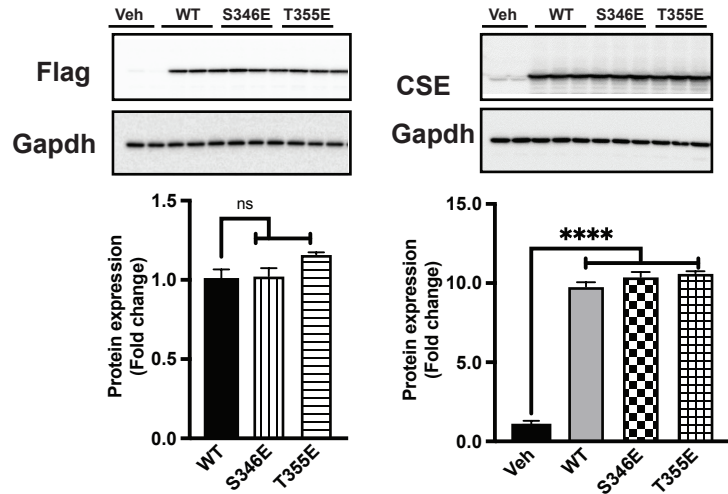

Suppl Figure 2

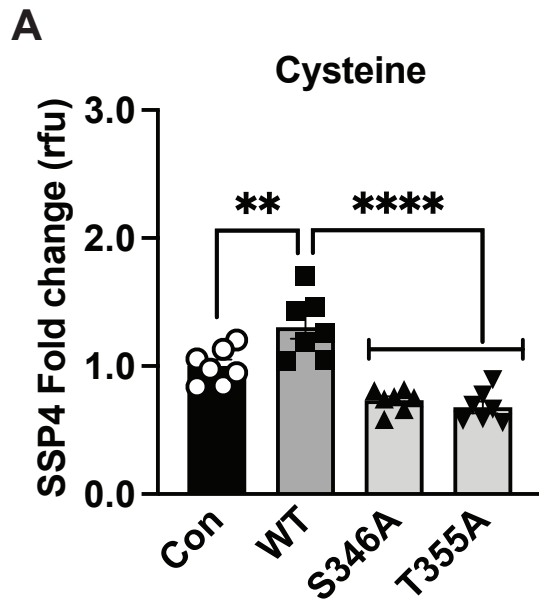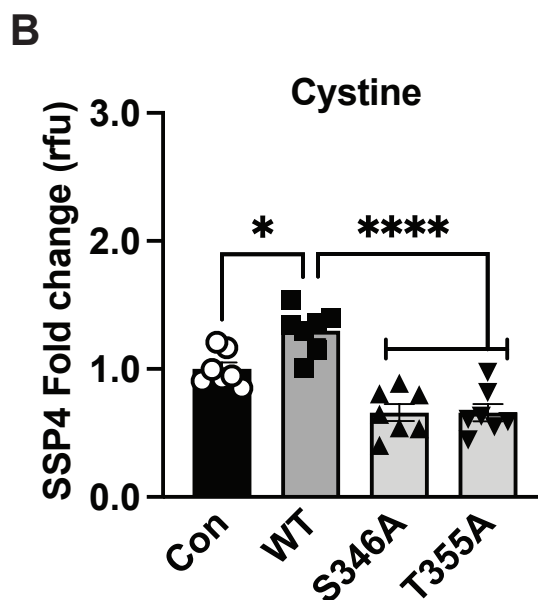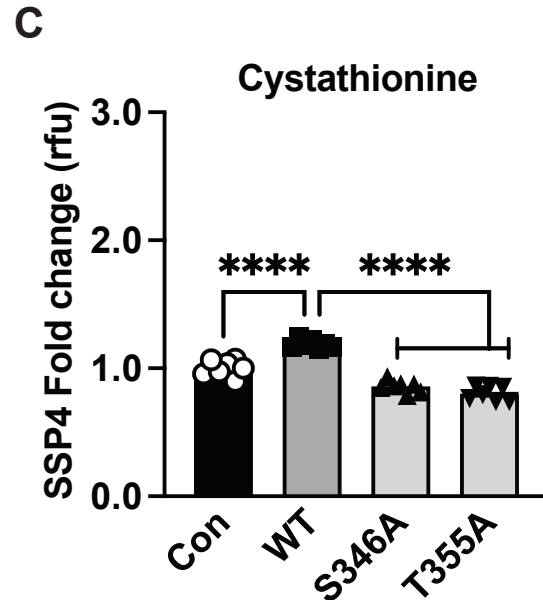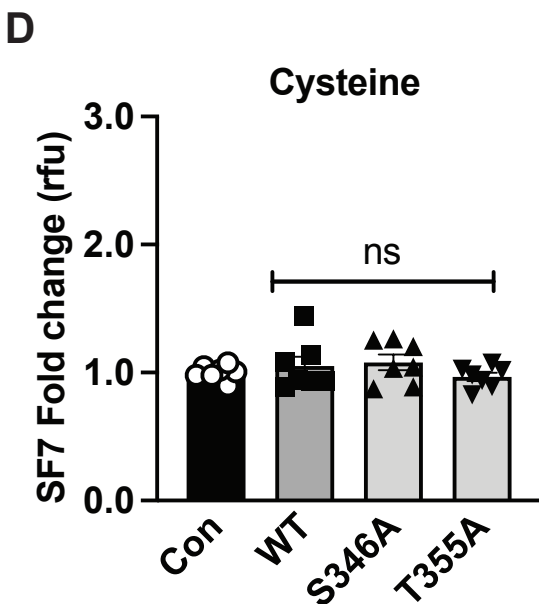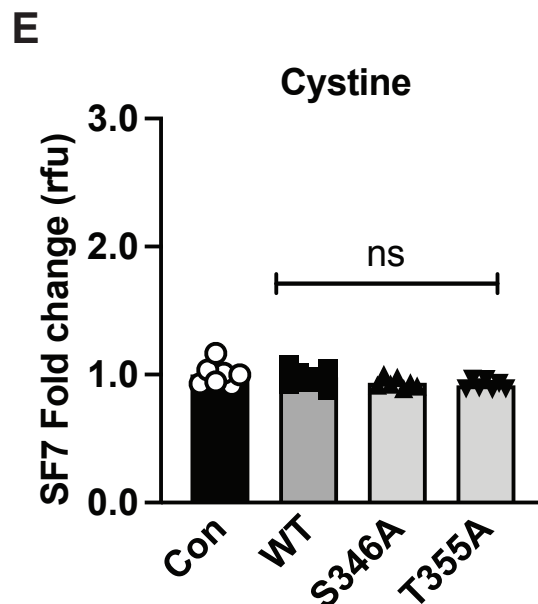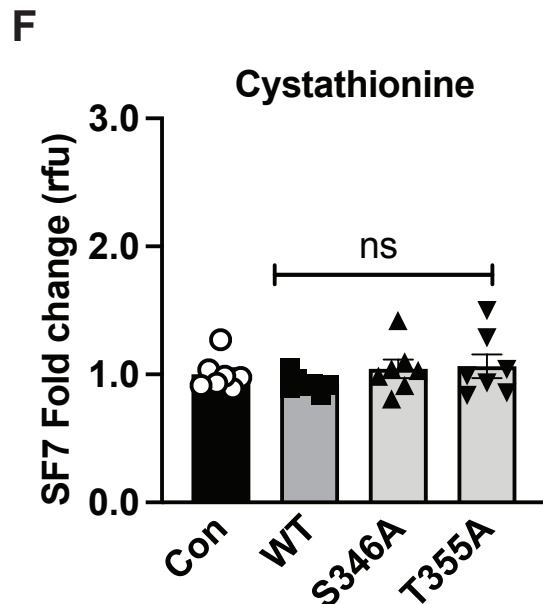

Suppl Figure 3

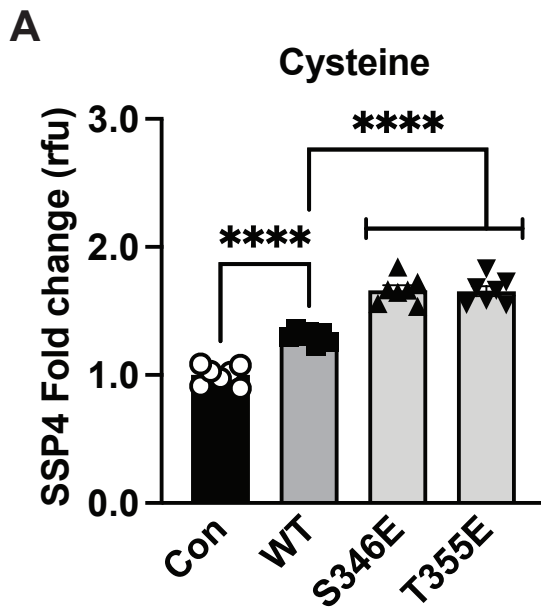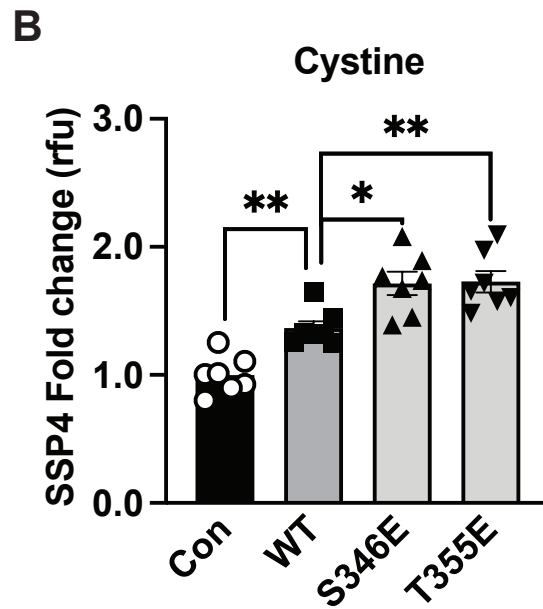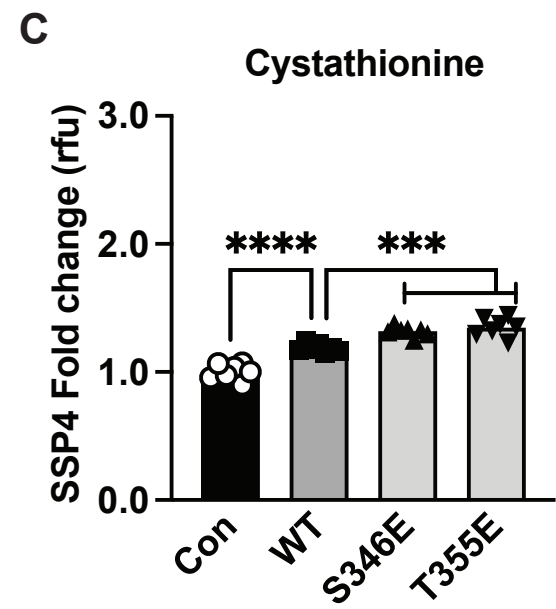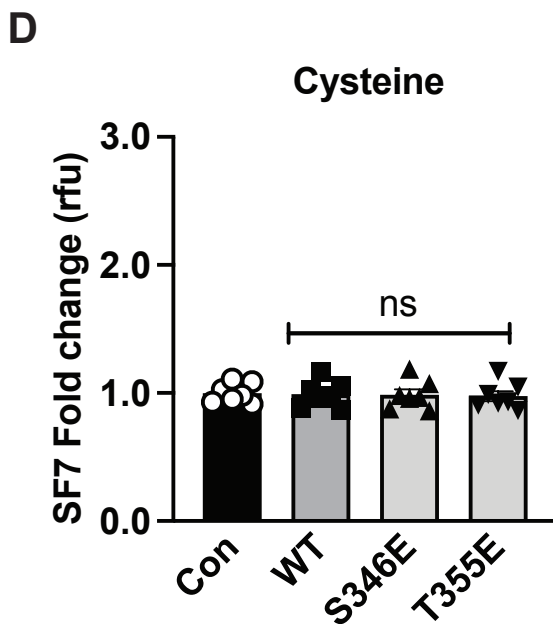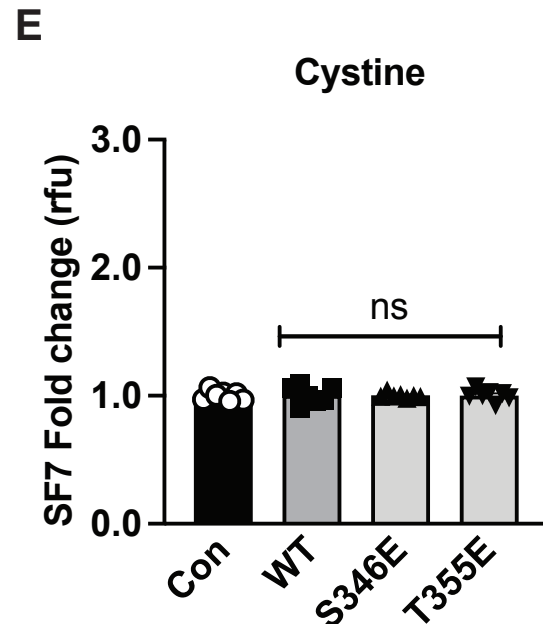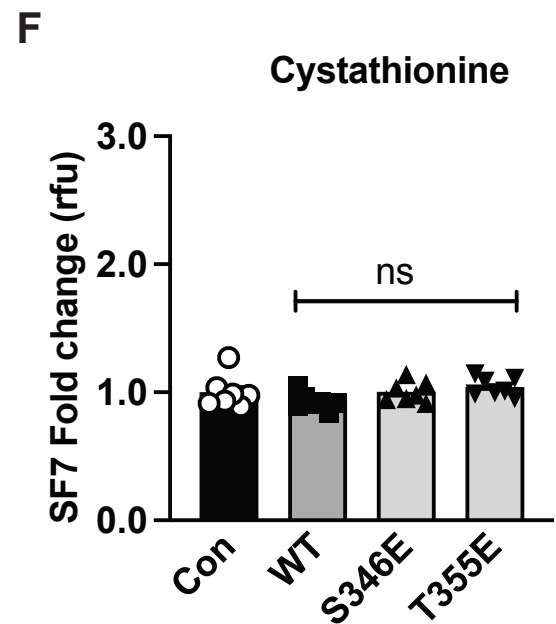

Suppl Figure 4

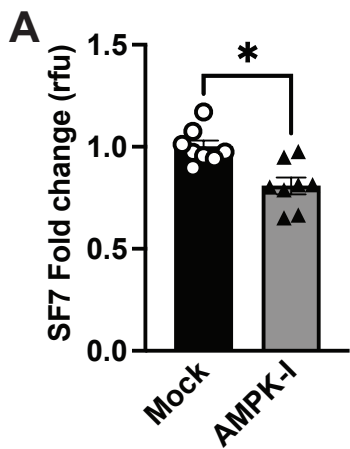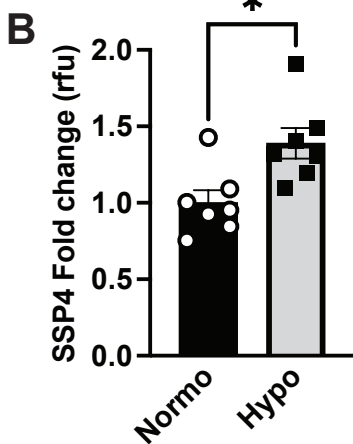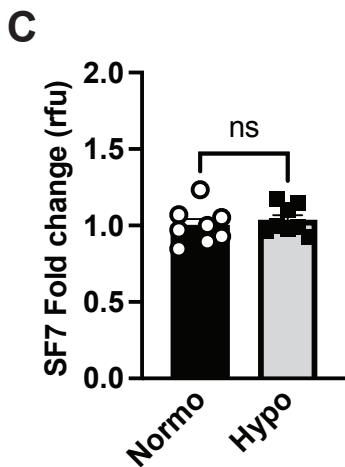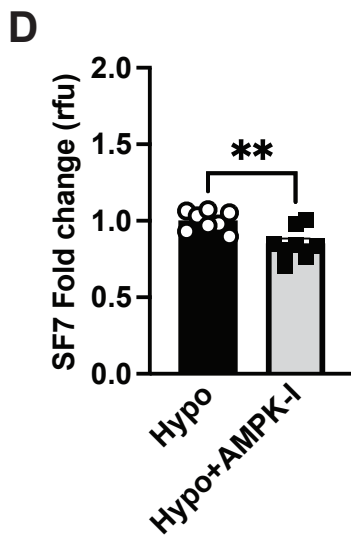

Suppl Figure 5

**A****pCSE346 in MAECs**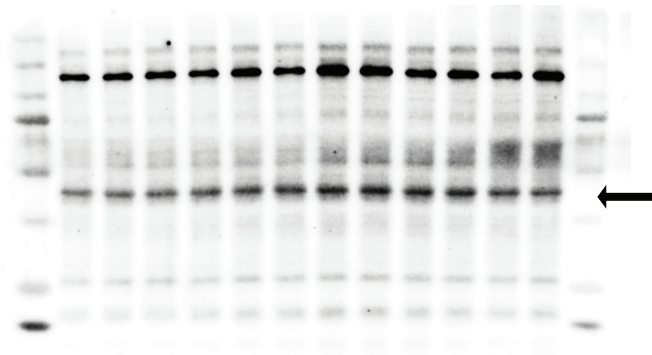**B****CSE in MAECs**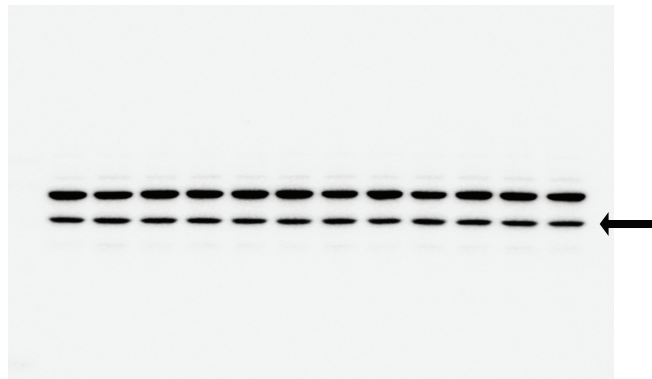**Suppl Figure 6**
